# Supplementary material for: An Intensive, Active Surveillance Reveals Continuous Invasion and High Diversity of Rhinovirus in Households
Source: PubMed Central journal article supplement (PMC6420174; doi:10.1093/infdis/jiy621), 2018-12-20

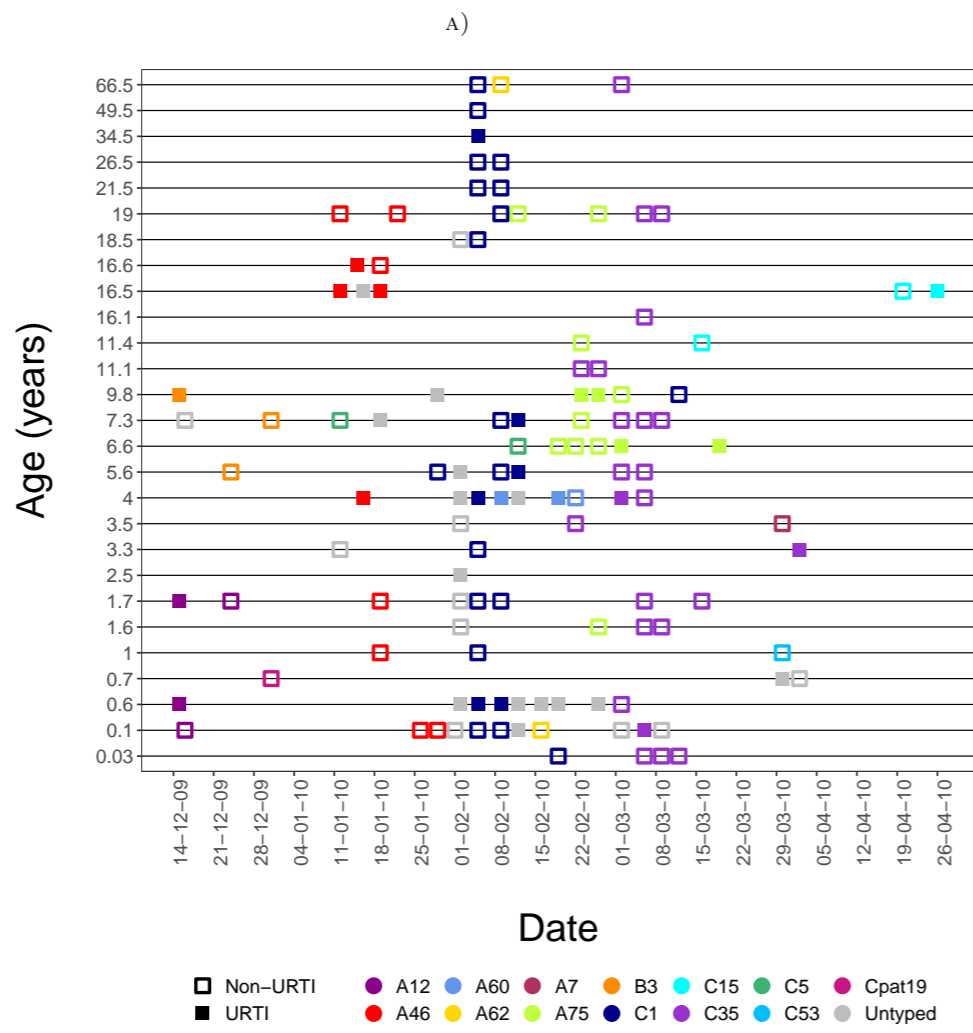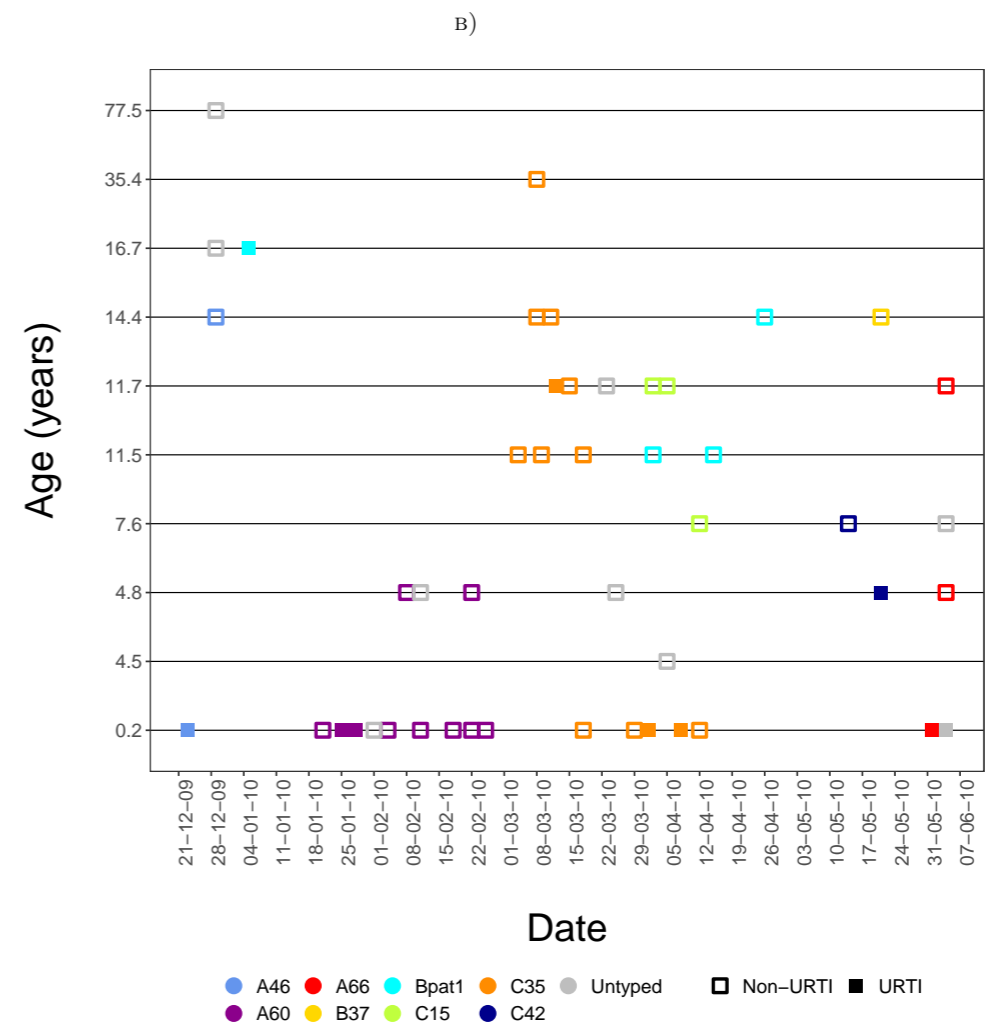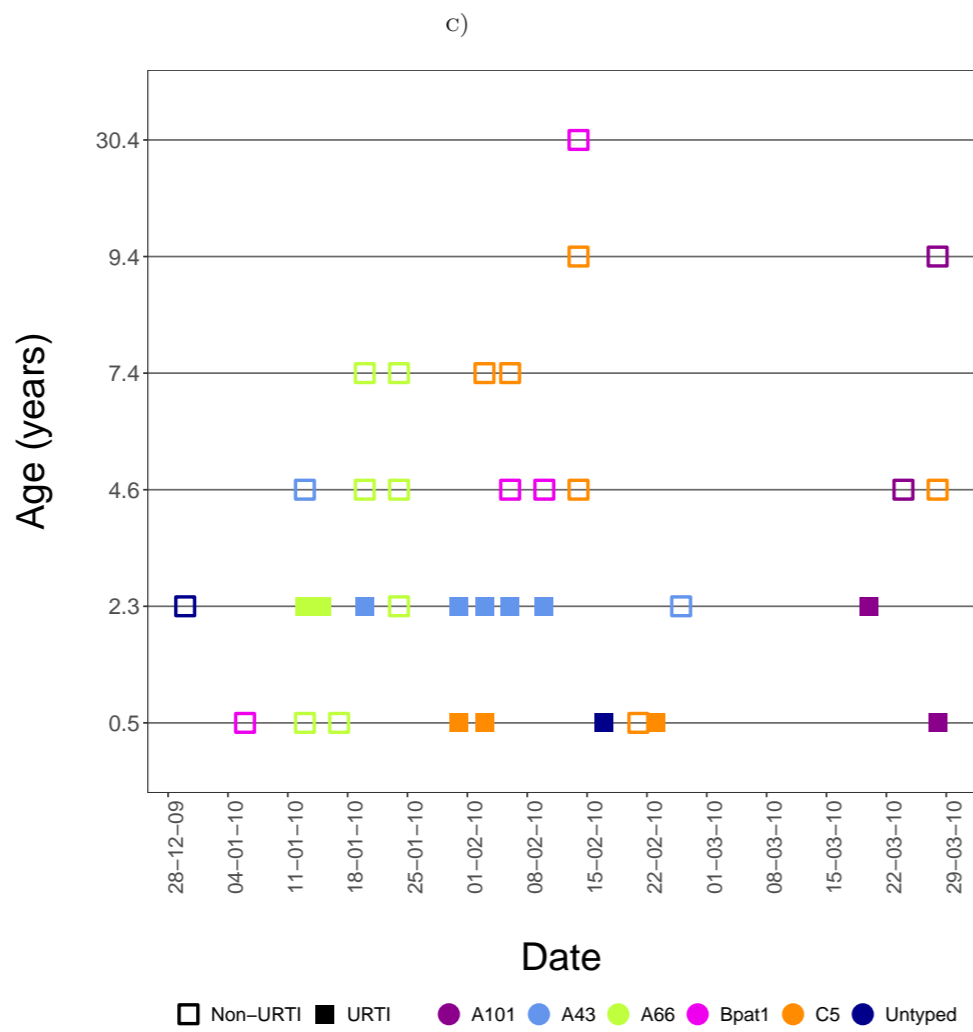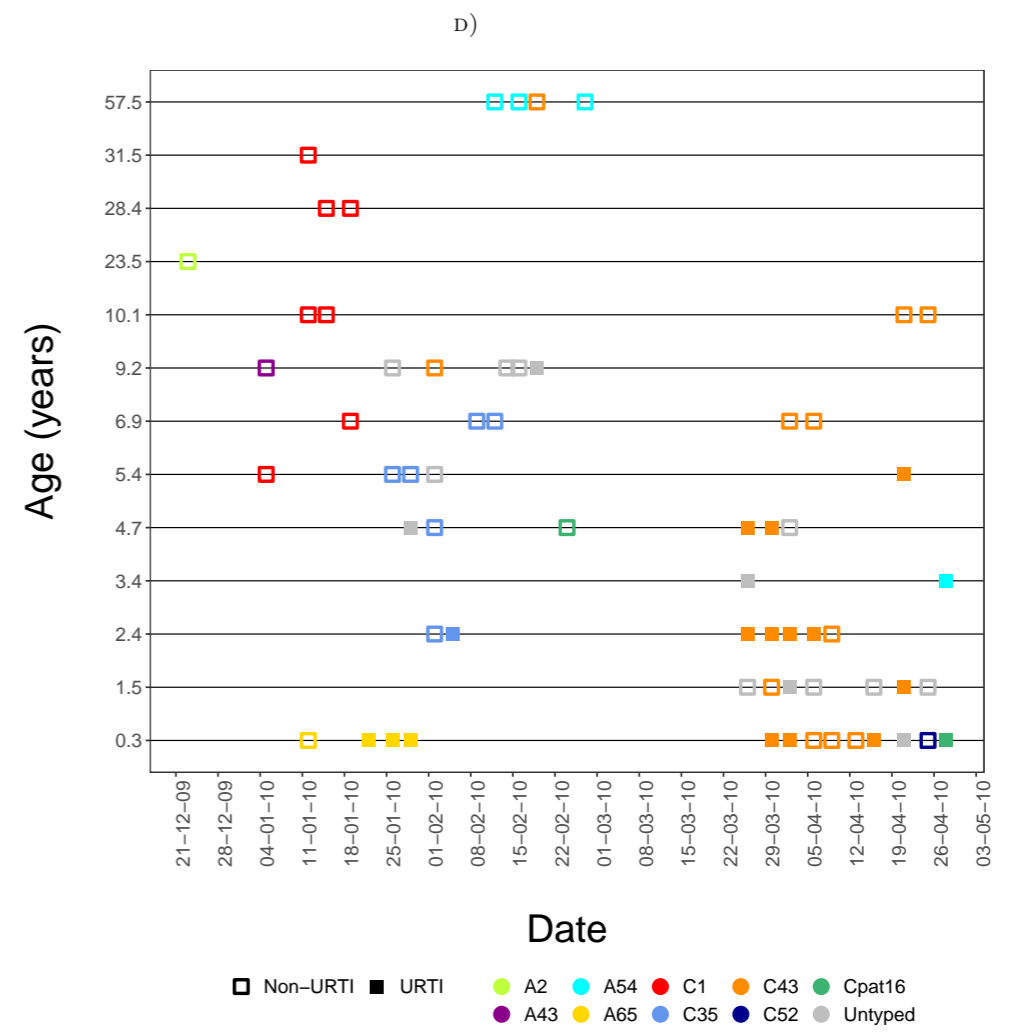

Supplement: jiy621_suppl_supplementary_figure-s2.pdf [file jiy621_suppl_supplementary_figure-s2.pdf]
